# Supplementary material
Source: publisher site journal article supplement (https://www.dovepress.com/article/491043)
Supplement: Supplementary file 1 [file get_supplementary_file.php]

**Supplement 1**

Simplified Endoscopic Score for Crohn’s disease (SES-CD):

SES-CD was scored for each of five bowel segments, including the ileum, right colon (ileocecal valve, cecum, and ascending colon to hepatic flexure), transverse colon, left colon (descending colon to splenic flexure and sigmoid colon), and rectum. This instrument consists of four items (presence/size of ulcers, proportion of ulcerated mucosal surface, proportion of mucosal surface affected by any other lesions, and presence/type of narrowing/strictures). Scores for each item range from 0 to 3. The total score ranges from 0 to 56, escalating as endoscopic disease severity increases; a score of 15 is considered the threshold for ‘severe disease’.

**Supplement 2**

Montreal Classification Criteria for Crohn's Disease：

Age at diagnosis (A)：

A1 ≤ 16 years old

A2 17 - 40 years old

A3 > 40 years old

Location of disease (L): L4 can co - exist with L1 to L3

L1 Terminal ileum

L2 Colon

L3 Ileocolon

L4 Upper gastrointestinal tract

Disease behavior (B): B1 may progress to B2 or B3 over time
B1 Non - stricturing, non - penetrating
B2 Stricture
B3 Penetrating

**Supplement 3**

The final formula of rad-score is:

rad-score = 0.220142 * wavelet.LLL_gldm_LargeDependenceLowGrayLevelEmphasis

- 0.83768 * wavelet.HHL_gldm_DependenceNonUniformityNormalized

+ 0.096684 * original_shape_Flatness

+ 0.016052 * wavelet.LHH_firstorder_Median

+ 0.587389 * original_shape_Maximum2DDiameterColumn

- 0.11826 * wavelet.LLL_glszm_LargeAreaHighGrayLevelEmphasis

+ 3.166756 * wavelet.HHL_glszm_SmallAreaEmphasis

- 0.30418 * original_glszm_LargeAreaLowGrayLevelEmphasis

- 0.49039 * wavelet.HHL_firstorder_Median

- 0.64991 * log.sigma.1.5.mm.3D_firstorder_10Percentile

- 0.63469 * log.sigma.0.5.mm.3D_glrlm_HighGrayLevelRunEmphasis

+ 0.628576 * wavelet.HLH_glszm_GrayLevelNonUniformity
